# Supplementary material for: Early lung carcinogenesis and tumor microenvironment observed by single-cell transcriptome analysis
Source: PubMed Central journal article supplement — Transl Oncol. 2021 Nov 18;15(1):101277. doi: 10.1016/j.tranon.2021.101277 (PMC8605359; doi:10.1016/j.tranon.2021.101277), 2021-11-18
Supplement: mmc4.pdf [file mmc4.pdf]

This document certifies that the manuscript

## **Early lung carcinogenesis and tumor microenvironment observed by single-cell transcriptome analysis**

prepared by the authors

**Eun Young Kim, Yoon Jin Cha, Sang Hoon Lee, Suk In Chung, Young Jun Choi, Duk Hwan Moon, Sung Soo Lee, Yoon Soo Chang**

was edited for proper English language, grammar, punctuation, spelling, and overall style by one or more of the highly qualified native English speaking editors at AJE.

This certificate was issued on **June 28, 2021** and may be verified on the [AJE website](#) using the verification code **6DE9-5009-BCOE-6EA6-E8BP**.

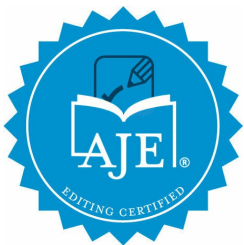

Neither the research content nor the authors' intentions were altered in any way during the editing process. Documents receiving this certification should be English-ready for publication; however, the author has the ability to accept or reject our suggestions and changes. To verify the final AJE edited version, please visit our verification page at [aje.com/certificate](#). If you have any questions or concerns about this edited document, please contact AJE at [support@aje.com](mailto:support@aje.com).
